# Supplementary material for: Material Characterization of Mayapán’s Effigy Censers’ Sherds
Source: MDPI journal article supplement (doi:10.3390/min13070974), 2023-07-22
Supplement: s1 [file s1]

Table S1. List of studied objects, with associated identifier code and related XRF and FORS spectra.

| No | Image                                                                               | Paper ID | XRF spectra | FORS spectra |
|----|-------------------------------------------------------------------------------------|----------|-------------|--------------|
| 1  |    | 96-001   | 1-10        | 250-257      |
| 2  |    | 98-002   | 370-376     | 346-351      |
| 3  |    | 96-003   | 364-369     | 340-344      |
| 4  |    | 96-004   | 278-282     | 258-263      |
| 5  |    | 96-005   | 88-106      | 22-30        |
| 6  |   | 98-006   | 107-119     | 31-37        |
| 7  |  | 97-007   | 377-380     | 351-354      |
| 8  |  | 96-008   | 54-66       | 6-9          |
| 9  |  | 96-009   | 49-53       | 10-12        |
| 10 |  | 98-010   | 160-164     | 76-82        |

Table S1. List of studied objects, with associated identifier code and related XRF and FORS spectra.

|    |                                                                                     |        |         |         |
|----|-------------------------------------------------------------------------------------|--------|---------|---------|
| 11 |    | 96-011 | 67-87   | 13-21   |
| 12 |    | 96-012 | 120-134 | 46-57   |
| 13 |    | 97-013 | 135-139 | 58-62   |
| 14 |    | 96-014 | 359-363 | 334-339 |
| 15 |    | 96-015 | 352-358 | 330-333 |
| 16 |  | 96-016 | 180-184 | 117-122 |
| 17 |  | 97-017 | 185-193 | 124-133 |
| 18 |  | 96-018 | 215-218 | 165-169 |
| 19 |  | 97-019 | 347-351 | 324-329 |
| 20 |  | 97-020 | 204-207 | 151-158 |

Table S1. List of studied objects, with associated identifier code and related XRF and FORS spectra.

|    |                                                                                     |        |         |         |
|----|-------------------------------------------------------------------------------------|--------|---------|---------|
| 21 |    | 97-021 | 178,179 | 109-116 |
| 22 |    | 98-022 | 225-227 | 180-188 |
| 23 |    | 99-023 | 128-132 | 189-193 |
| 24 |    | 97-024 | 208-214 | 159-163 |
| 25 |    | 96-025 | 196-203 | 138-150 |
| 26 |   | 96-026 | 219-222 | 170-173 |
| 27 |  | 97-027 | 223,224 | 175-179 |
| 28 |  | 97-028 | 240-245 | 204-215 |
| 29 |  | 96-029 | 233-239 | 194-203 |
| 30 |  | 91-030 | 264-268 | 237-239 |
| 31 |  | 96-031 | 342-346 | 319-323 |
| 32 |  | 96-032 | 246-251 | 216-222 |

Table S1. List of studied objects, with associated identifier code and related XRF and FORS spectra.

|    |                                                                                     |        |         |         |
|----|-------------------------------------------------------------------------------------|--------|---------|---------|
| 33 |    | 96-033 | 257-263 | 223-229 |
| 34 |    | 96-034 | 270-275 | 240-247 |
| 35 |    | 05-035 | 252-256 | 231-236 |
| 36 |    | 96-036 | 145-150 | 90-95   |
| 37 |    | 96-037 | 172-177 | 103-108 |
| 38 |   | 96-038 | 165-170 | 96-102  |
| 39 |  | 98-039 |         | 70-71   |
| 40 |  | 98-040 |         | 72      |
| 41 |  | 97-041 | 153-155 | 65-69   |
| 42 |  | 97-042 | 151,152 |         |
| 43 |  | 98-043 | 33-48   | 38-45   |
| 44 |  | 96-044 | 0-1     | 11-32   |

Table S1. List of studied objects, with associated identifier code and related XRF and FORS spectra.

|    |                                                                                     |        |         |         |
|----|-------------------------------------------------------------------------------------|--------|---------|---------|
| 45 |    | 96-045 | 3-5     |         |
| 46 |    | 99-046 | 156-158 |         |
| 47 |    | 99-047 | 159     | 73-75   |
| 48 |    | 96-048 | 336-341 | 313-318 |
| 49 |    | 96-049 | 326     | 312     |
| 50 |   | 96-050 | 320-325 | 308-311 |
| 51 |  | 98-051 | 328-335 | 302-307 |
| 52 |  | 96-052 | 313-319 | 296-301 |
| 53 |  | 96-053 | 308-311 | 288-295 |
| 54 |  | 96-054 | 304-307 | 283-287 |
| 55 |  | 96-055 | 301-303 | 280-282 |
| 56 |  | 96-056 | 295-300 | 278-279 |
| 57 |  | 96-057 |         |         |

Table S1. List of studied objects, with associated identifier code and related XRF and FORS spectra.

|    |                                                                                     |        |         |         |
|----|-------------------------------------------------------------------------------------|--------|---------|---------|
| 58 |    | 96-058 | 283-288 | 264-271 |
| 59 |    | 99-059 | 194-195 | 134-137 |
| 60 |    | 96-060 | 140-141 | 83-85   |
| 61 |    | 96-061 | 142-143 | 86-88   |
| 62 |    | 96-062 | 289-291 | 272-275 |
| 63 |   | 96-063 | 292-294 | 276-277 |
| 64 |  | 96-064 | 658-660 | 443-444 |
| 65 |  | 97-065 | 673-677 | 452-454 |
| 66 |  | 96-066 | 678-680 | 459-463 |
| 67 |  | 00-067 |         | 445-447 |
| 68 |  | 97-068 | 661-666 | 448-451 |

Table S1. List of studied objects, with associated identifier code and related XRF and FORS spectra.

|    |                                                                                   |        |         |         |
|----|-----------------------------------------------------------------------------------|--------|---------|---------|
| 69 |  | 97-069 | 681-683 | 455     |
| 70 |  | 97-070 | 667-672 | 456-458 |
| 71 |  | 00-071 |         |         |
| 72 |  | 97-072 | 649-657 | 416-422 |
